# Supplementary material
Source: PubMed Central journal article supplement (PMC6166679)
Supplement: 134627_2_supp_139175_p8tnfy.pdf [file 134627_2_supp_139175_p8tnfy.pdf]

Supp.Figure 1

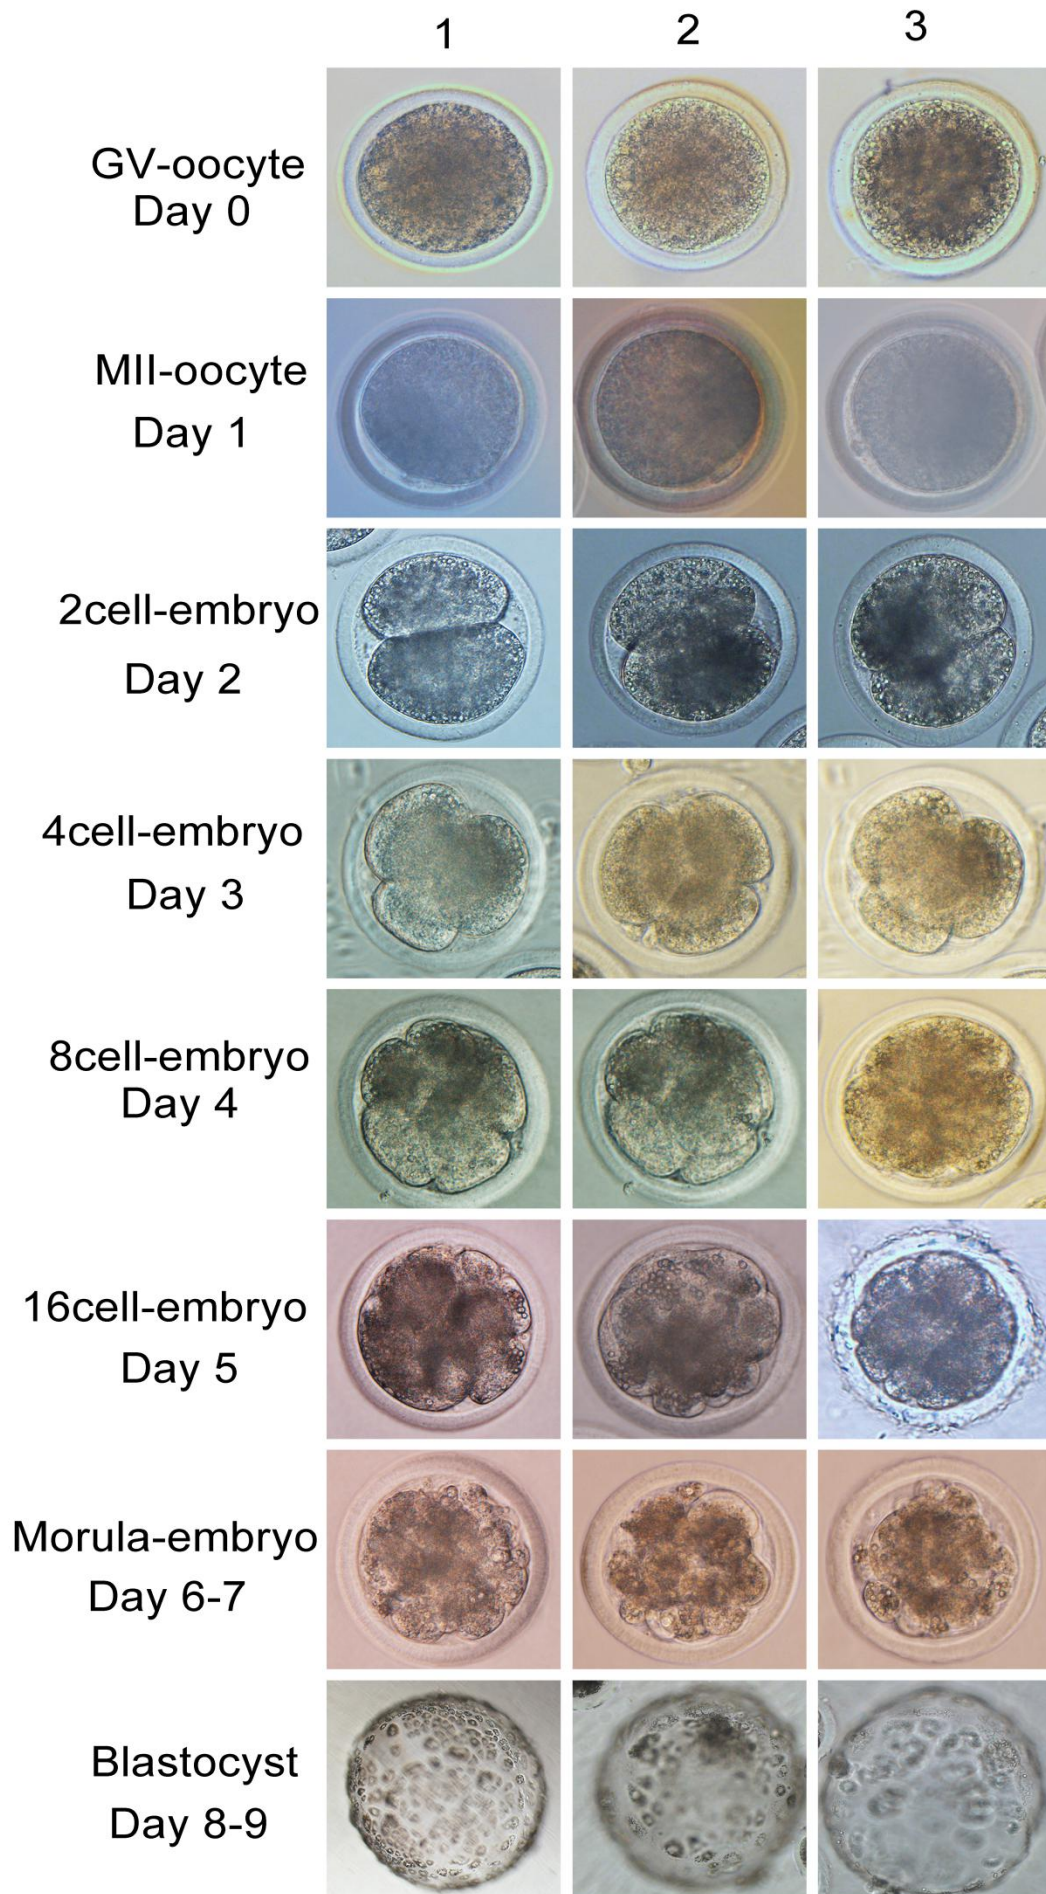

## Supp.Figure 2

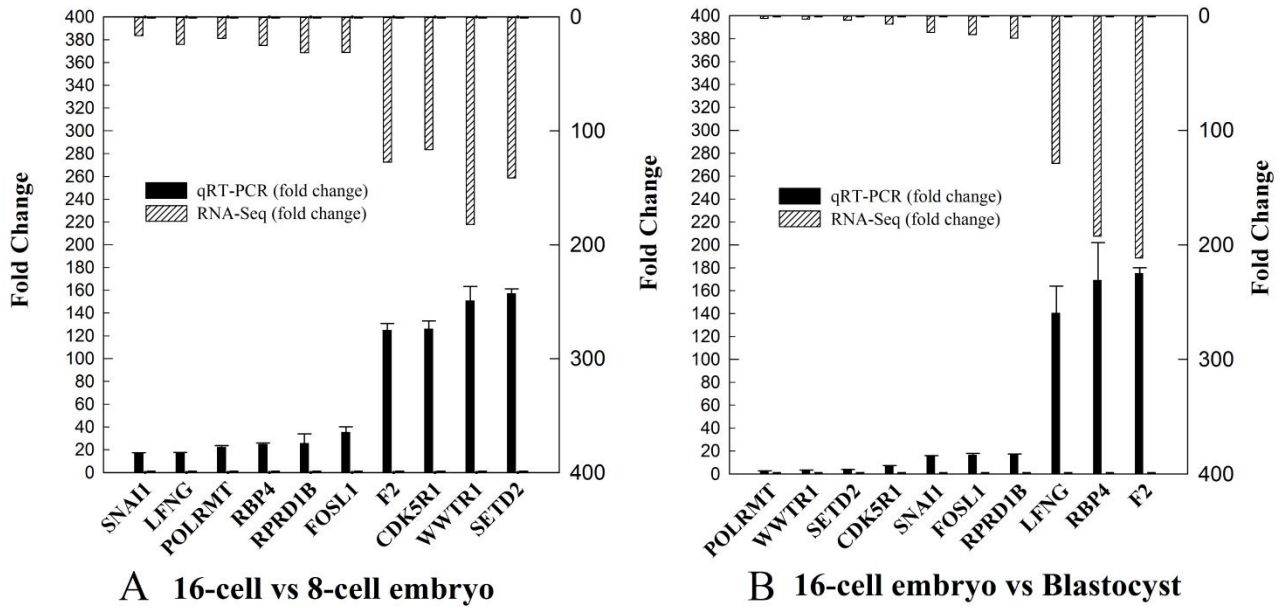

## Supplementary Figure Captions

**Figure S1.** The pictures of morphology for eight stages from early embryonic development in buffalo parthenogenesis.

**Figure S2.** The qRT-PCR validation for the transcriptomic data of single-cell/embryo.

(A) Ten genes that up-regulated in 16-cell stage were detected in the 8-cell and the 16-cell stages, which made 8-cell as a control. The white pillar represents the fold change of the RNA-Seq data and the black pillar represents the fold change of the qRT-PCR data. (B) Ten genes that up-regulated in 16-cell stage were detected in the 16-cell and the blastocyst stages, which made Blastocyst as a control. The white pillar represents the fold change of the RNA-Seq data and the black pillar represents the fold change of the qRT-PCR data.
